# Supplementary material for: A simple preparation method of carbon dots by weak power bathroom lamp irradiation and their application for nimesulide detection and bioimaging
Source: Royal Society of Chemistry journal article supplement (doi:10.1039/c8ra06313c), 2018-01-01
Supplement: c8ra06313c1.pdf [file c8ra06313c1.pdf]

## A Simple Preparation Method of Carbon Dot by Weak Power Bathroom Lamp Irradiation and Its Application for Nimesulide Detection and Bioimaging

Jinping Song,<sup>a</sup> Qi Ma<sup>\*a</sup>, Xiaomin Liang<sup>b</sup>, Sufang Zhang<sup>a</sup>, Lazhen Shen<sup>a</sup>, Yong Guo<sup>a</sup> and  
Feng Feng<sup>\*a</sup>

*a. College of Chemistry and Environmental Engineering, and Institute of Applied Chemistry,  
Shanxi Datong University, Datong, Shanxi, 037009, China*

*b. Institute of Chemistry and Material Science, Shanxi Normal University, Linfen, 041001, China.*

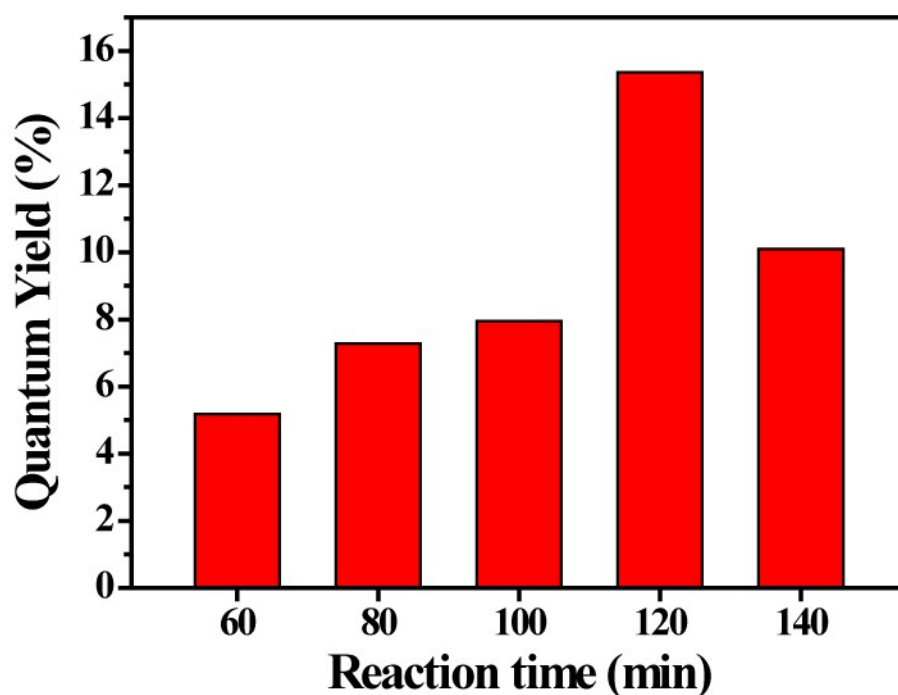

Figure S1 Effect of irradiation time on quantum yield of CDs.

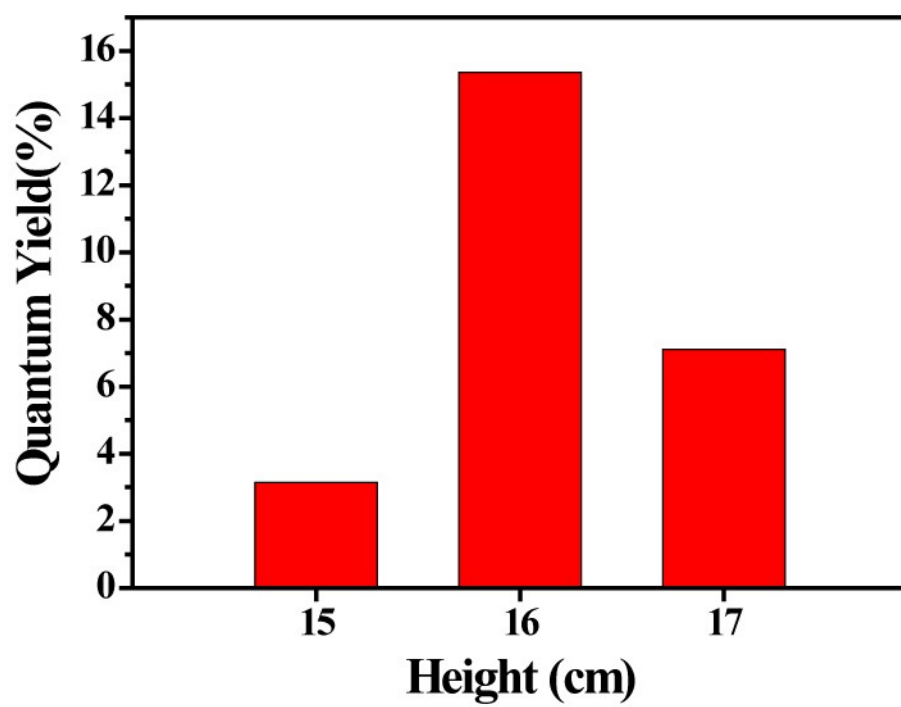

Figure S2 Effect of distance between the lamp and the sample on quantum yield of CDs.

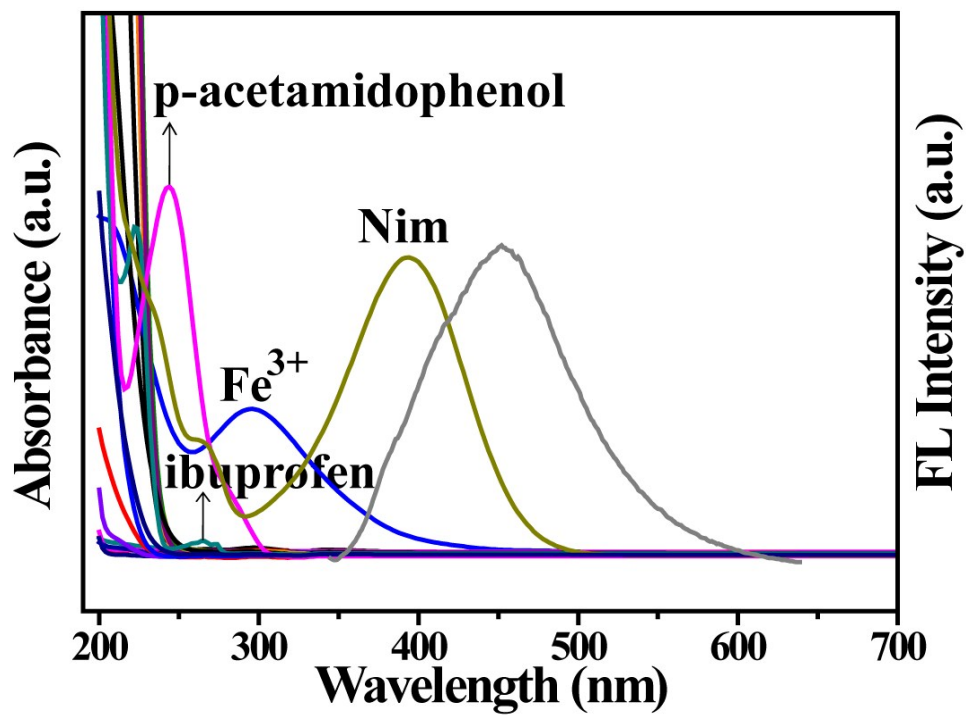

Figure S3 Absorption bands of analytes ( $\text{Ag}^+$ ,  $\text{Ba}^{2+}$ ,  $\text{Fe}^{3+}$ ,  $\text{Fe}^{2+}$ ,  $\text{Ca}^{2+}$ ,  $\text{Cu}^{2+}$ ,  $\text{Cr}^{3+}$ ,  $\text{Mn}^{2+}$ ,  $\text{Mg}^{2+}$ ,  $\text{Al}^{3+}$ ,  $\text{Ni}^{2+}$ ,  $\text{Zn}^{2+}$ ,  $\text{Pb}^{2+}$ ,  $\text{Cd}^{2+}$ ,  $\text{Hg}^{2+}$ , alanine, glycine, glutamate, ibuprofen, p-acetamidophenol and Nim) overlap with fluorescence spectroscopy of CDs (gray line).

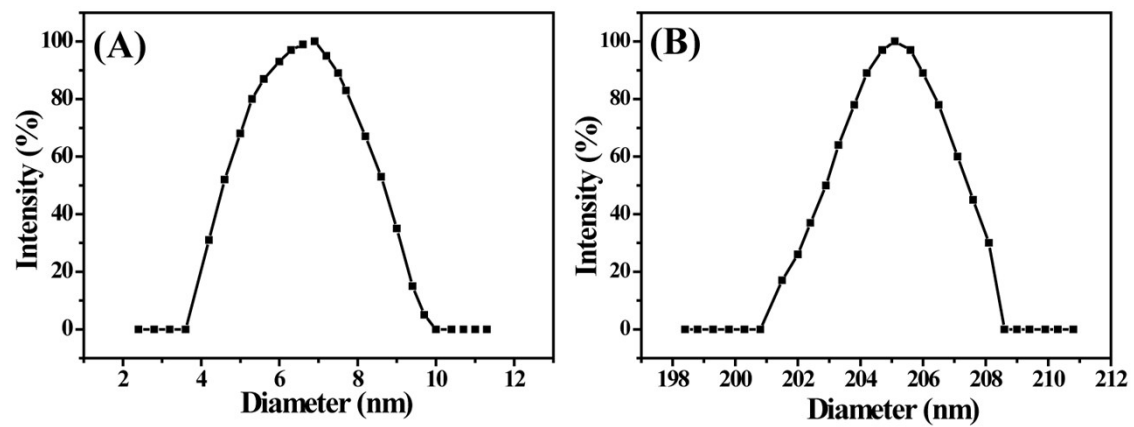

Figure S4 Size distribution of CDs without (A) and with Nim (B).

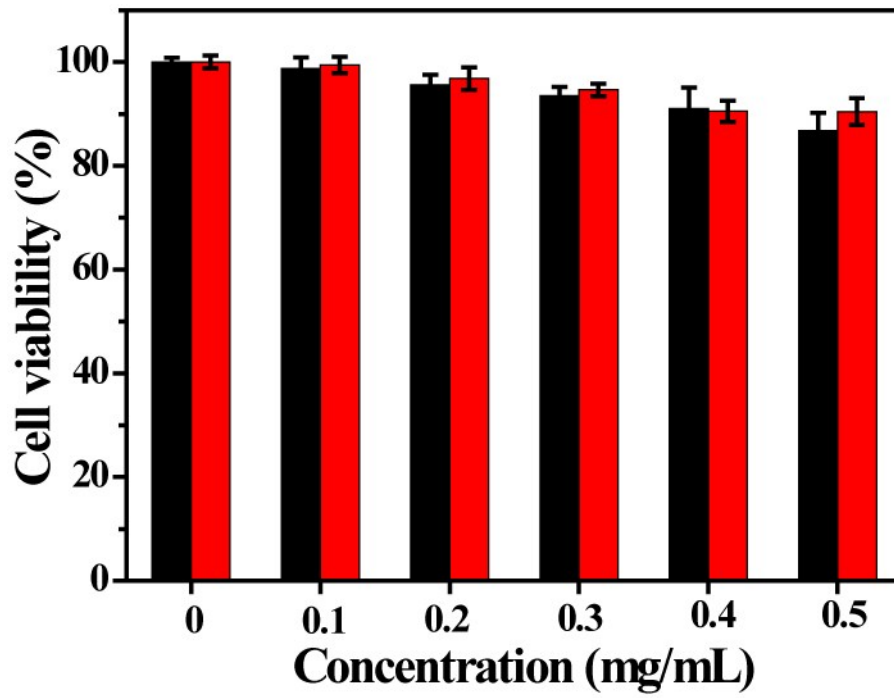

Figure S5 Cell viability after incubation with CDs for 72 h. Black column is HeLa cells, Red column is ADSC cells.
